# Supplementary material for: A novel TICT-based molecular rotor: synthesis, crystal structure and application in high resolution imaging of sweat pores
Source: Royal Society of Chemistry journal article supplement (doi:10.1039/d4tc02400a), 2024-01-01
Supplement: d4tc02400a1.pdf [file d4tc02400a1.pdf]

## A Novel TICT-based Molecular Rotor: Synthesis, Crystal structure and Application in High Resolution Imaging of Sweat Pores

Sanjeev Kumar<sup>a</sup>, Balkaran Singh Sran<sup>a</sup>, Dharmendra Gahalot<sup>b</sup>, Prakash Chandra Mishra<sup>b</sup> and Prabhpreet Singh<sup>\*a</sup>

<sup>a</sup>Department of Chemistry, UGC Centre for Advanced Studies-II, Guru Nanak Dev University, Amritsar 143001 (pb.)-India

<sup>b</sup>Department of Biotechnology, Guru Nanak Dev University, Amritsar 143001 (pb.)-India

E-mail: prabhpreet.chem@gndu.ac.in; M: +91 8427101534.

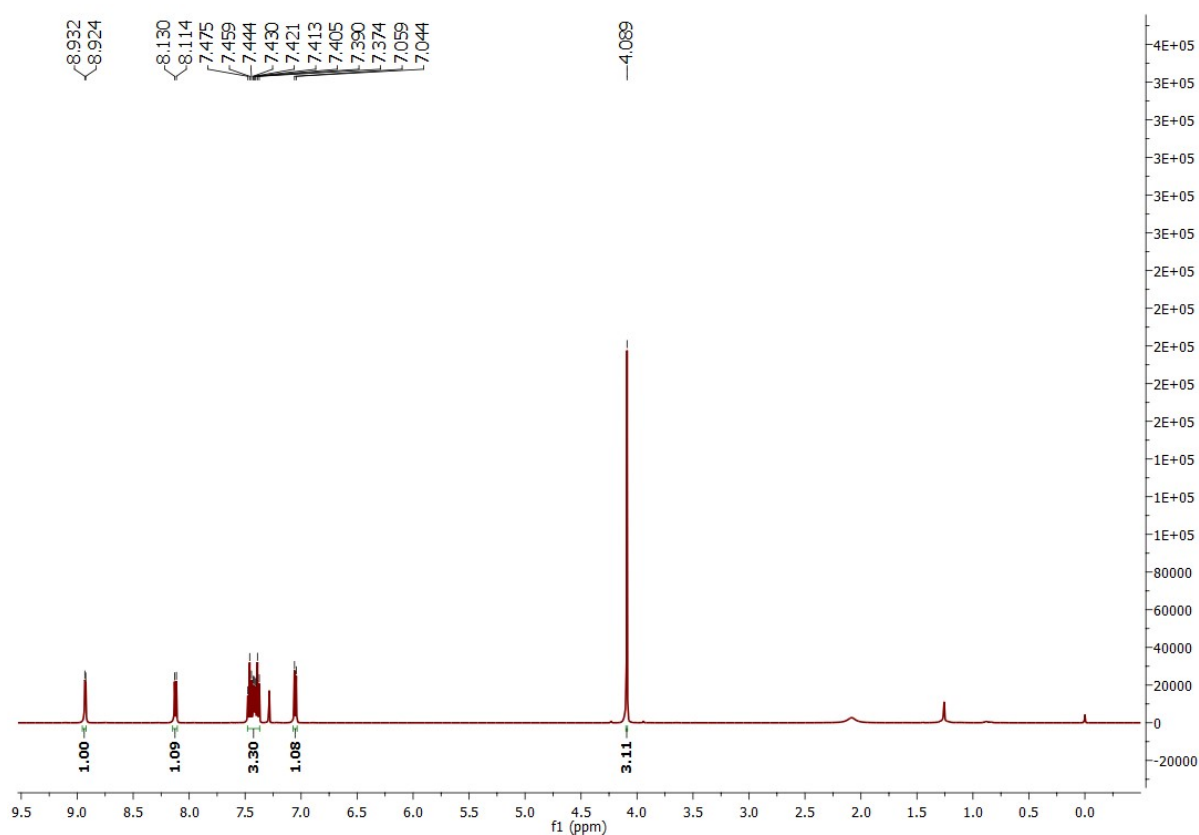

**Figure S1:** <sup>1</sup>H NMR data of 8-methoxyquinoline.

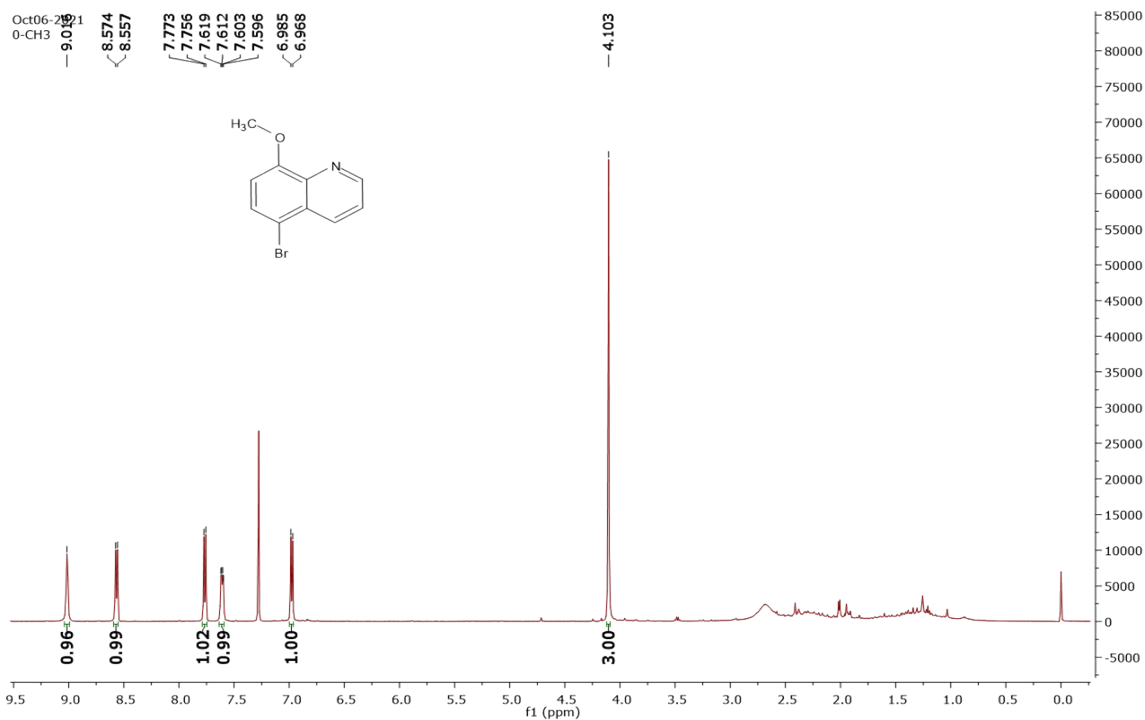

Figure S2: <sup>1</sup>H NMR data of Compound 2.

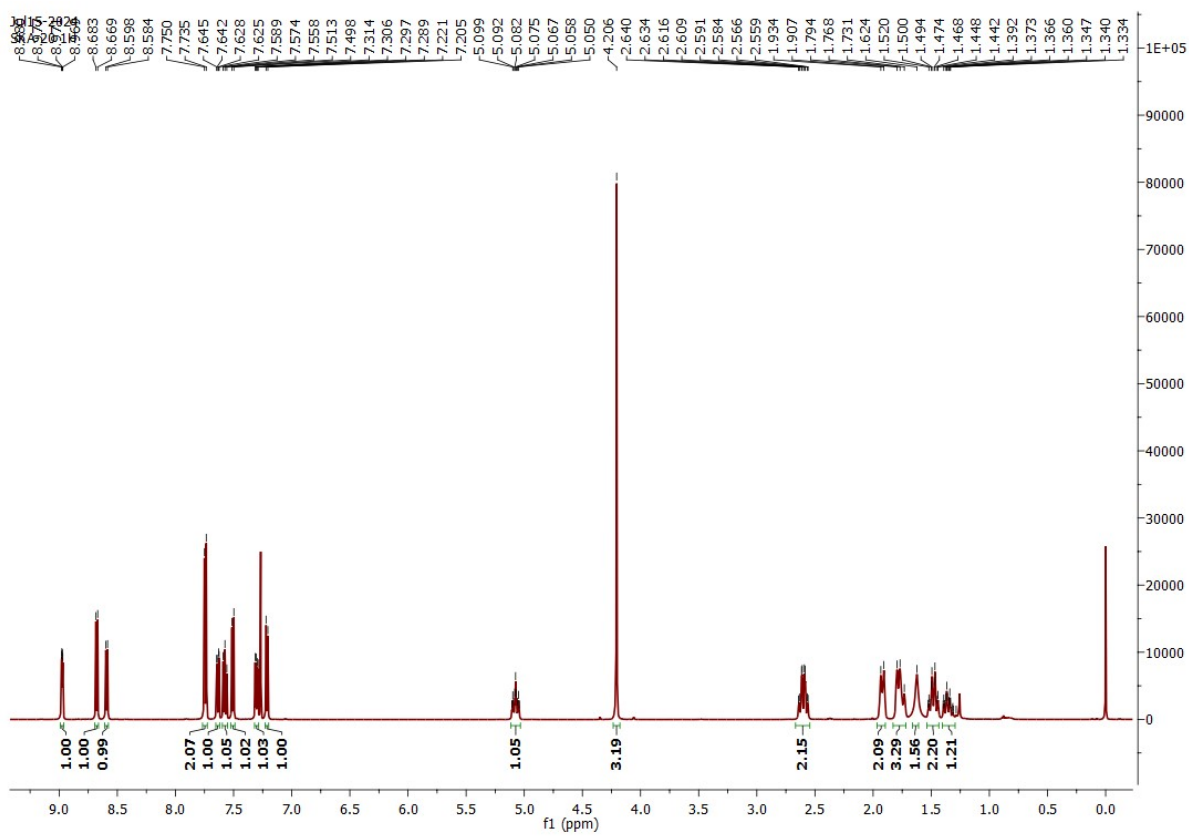

Figure S3: <sup>1</sup>H NMR data of NI-HQ.

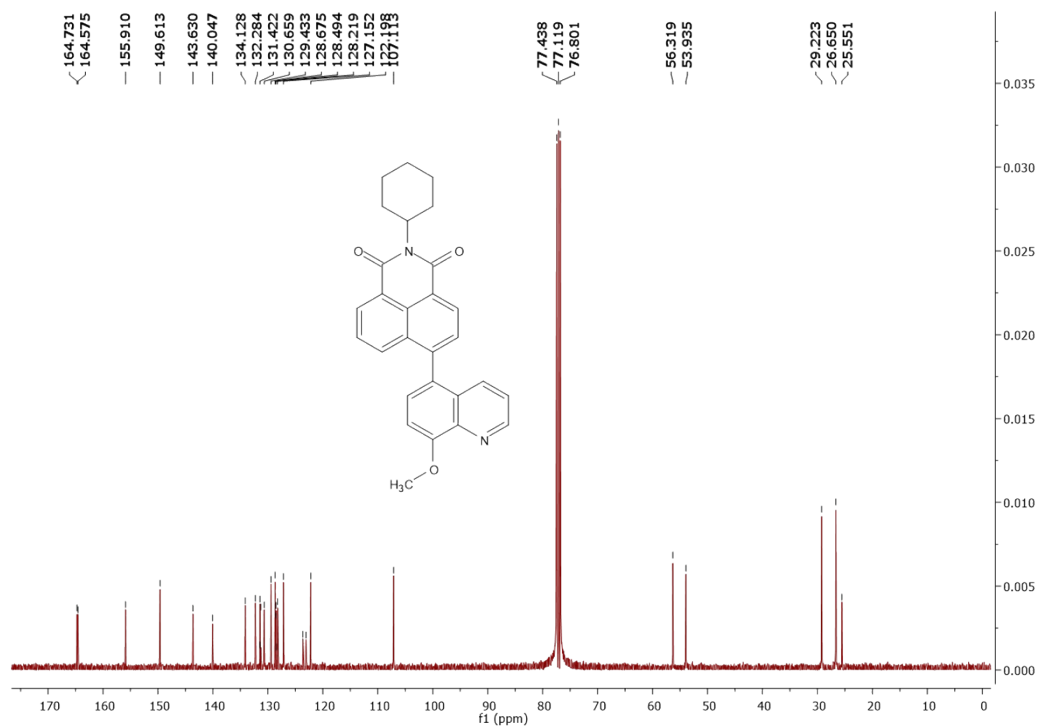

Figure S4: <sup>13</sup>C NMR data of NI-HQ.

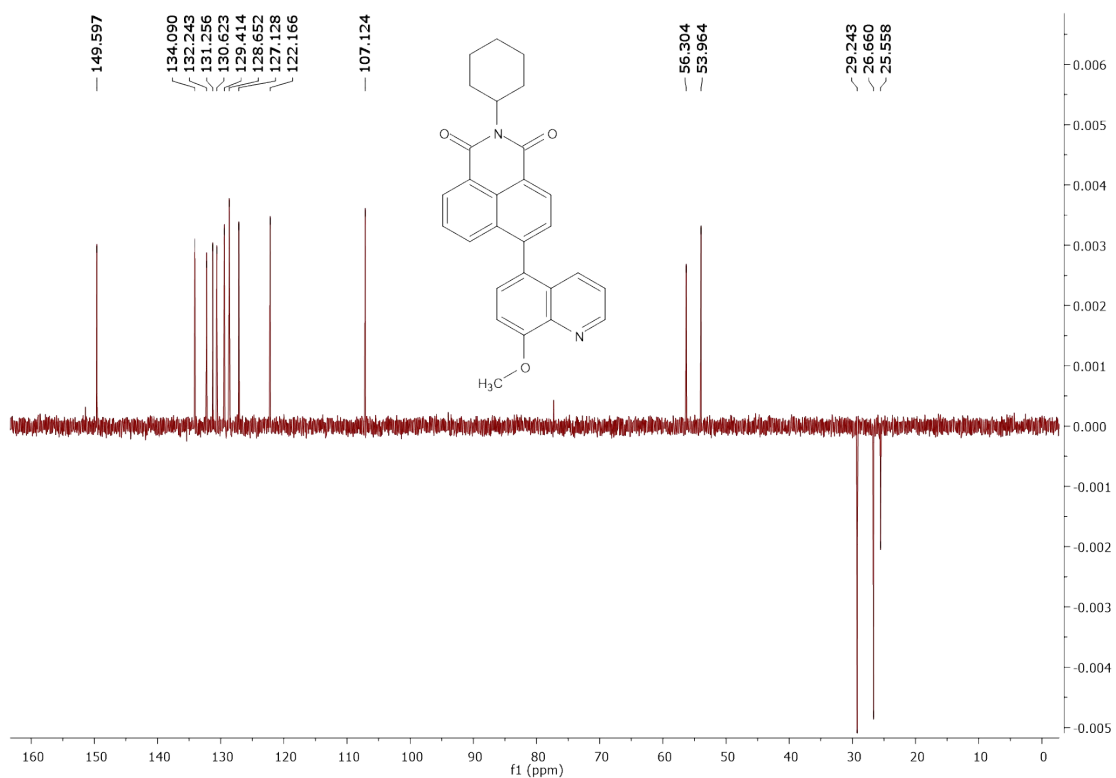

Figure S5: <sup>13</sup>C-DEPT NMR data of NI-HQ.

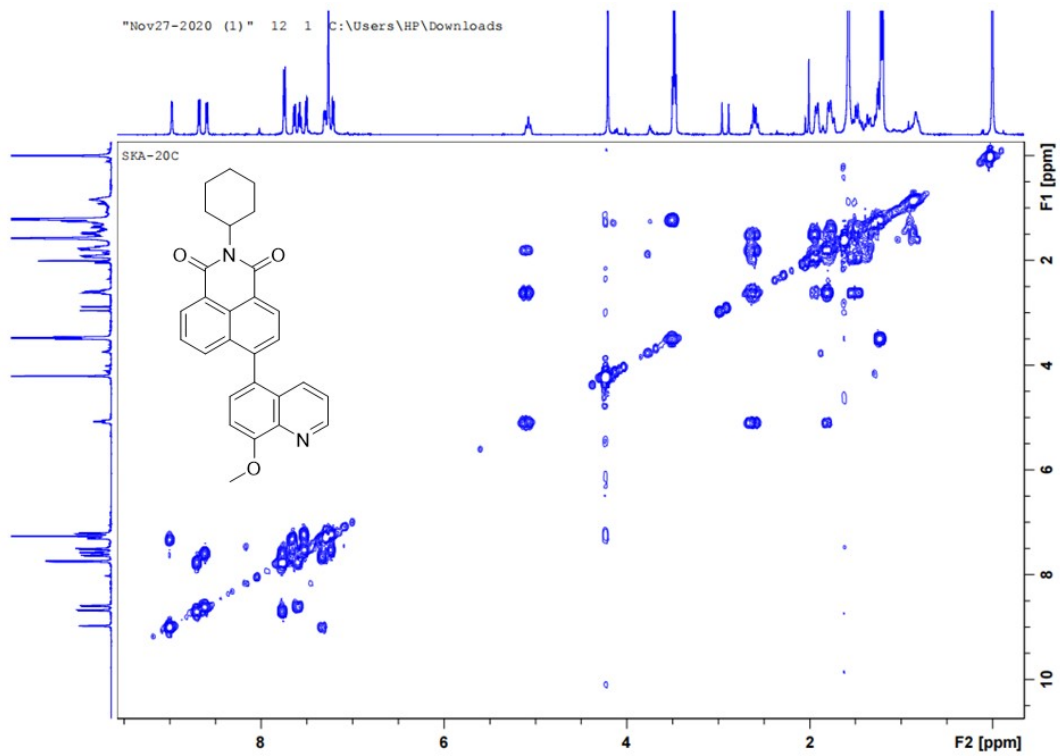

**Figure S6:**  $^1\text{H}$ - $^1\text{H}$  COSY NMR data of NI-HQ.

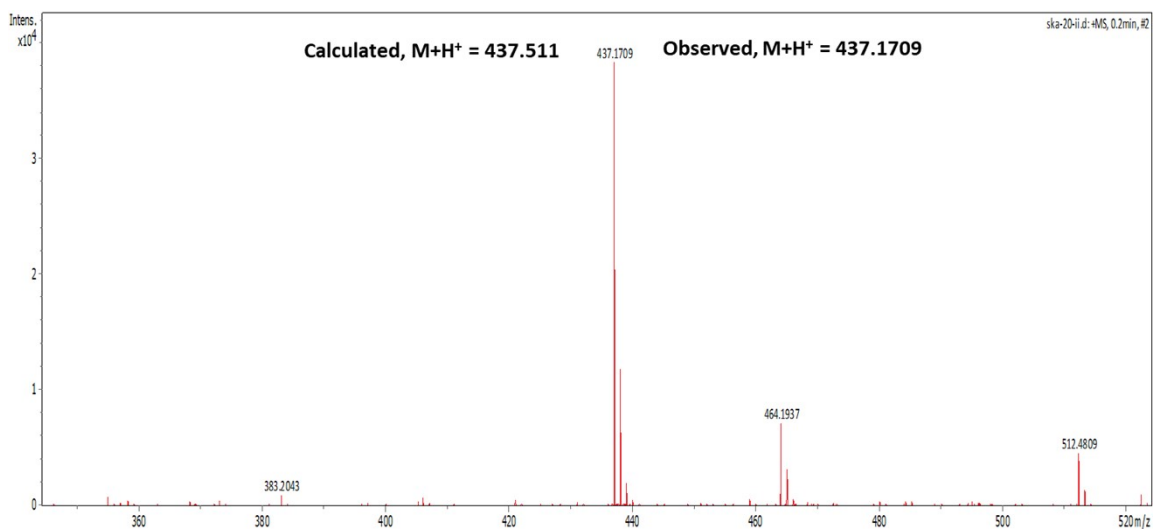

**Figure S7:** HRMS data of NI-HQ.

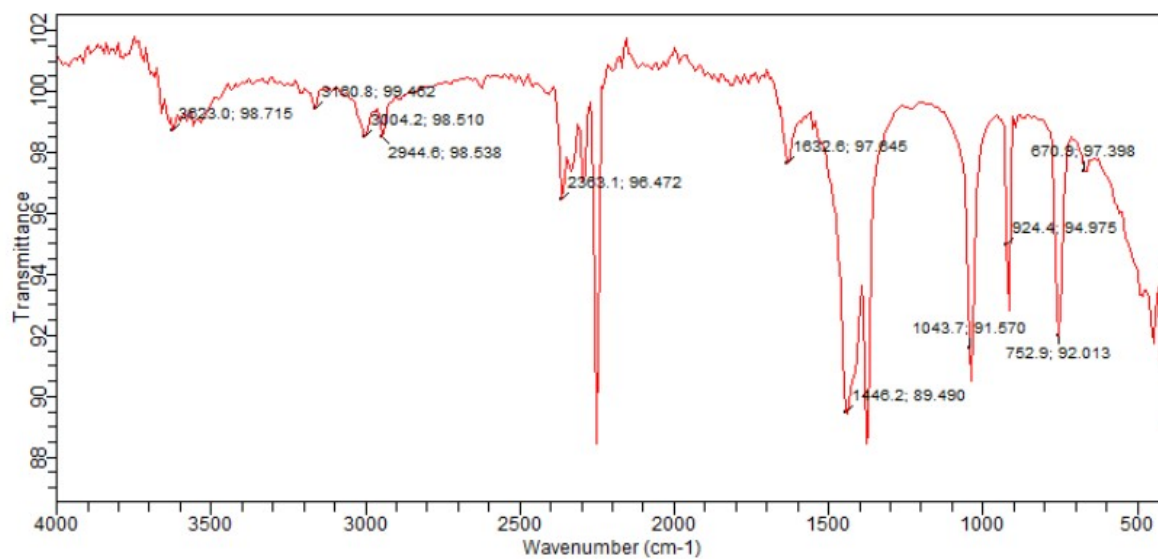

**Figure S8:** FTIR data of NQ-OCH<sub>3</sub>.

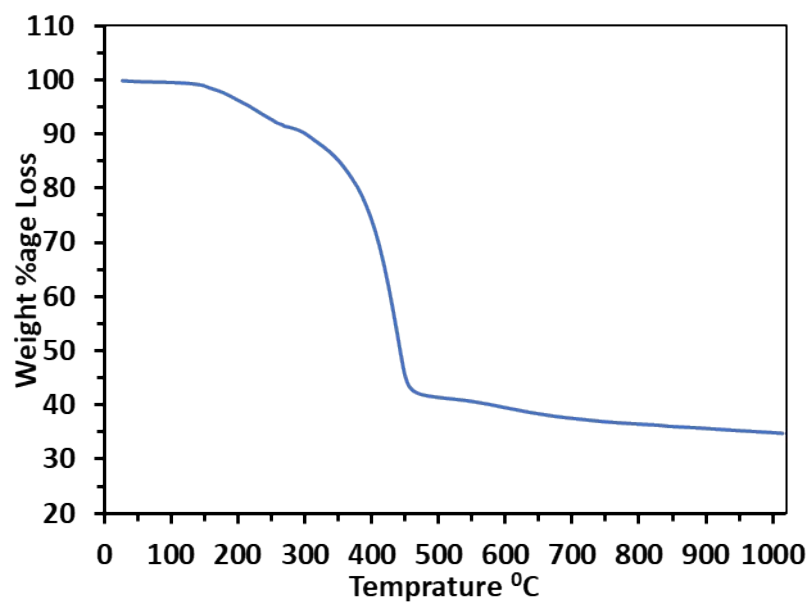

**Figure S9:** TGA data of NI-HQ.

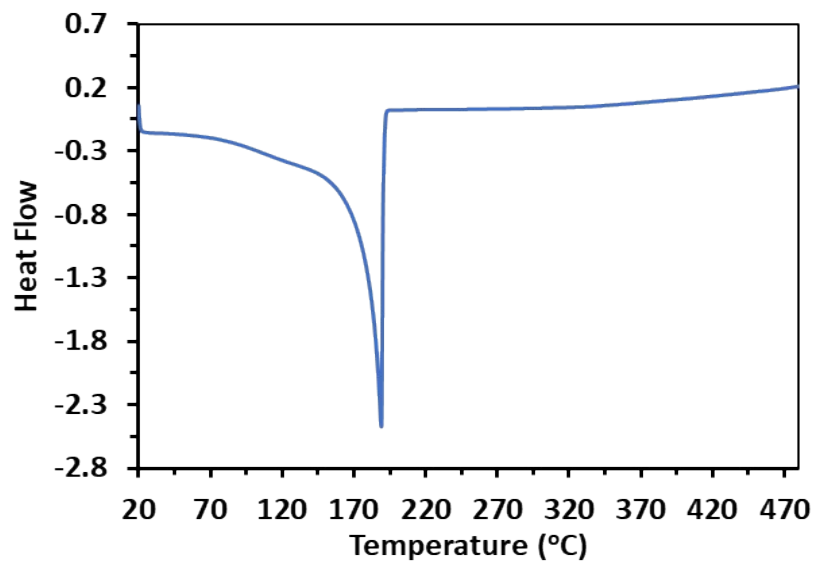

**Figure S10:** DSC data of NI-HQ.

**Table S1: Crystal data and structure refinement for NI-HQ.**

|                                                |                                                                        |
|------------------------------------------------|------------------------------------------------------------------------|
| Identification code                            | <b>NI-HQ</b>                                                           |
| CCDC Number                                    | 2094838                                                                |
| Empirical formula                              | $C_{28}H_{24}N_2O_3$                                                   |
| Formula weight                                 | 436.49                                                                 |
| Temperature/K                                  | 296.15                                                                 |
| Crystal system                                 | Triclinic                                                              |
| Space group                                    | P-1                                                                    |
| a/Å                                            | 8.698(4)                                                               |
| b/Å                                            | 10.218(4)                                                              |
| c/Å                                            | 17.020(8)                                                              |
| $\alpha/^\circ$                                | 99.167(8)                                                              |
| $\beta/^\circ$                                 | 98.646(7)                                                              |
| $\gamma/^\circ$                                | 108.563(16)                                                            |
| Volume/Å <sup>3</sup>                          | 1382.6(11)                                                             |
| Z                                              | 2                                                                      |
| $\rho_{\text{calc}}$ [gcm <sup>-3</sup> ]      | 1.048                                                                  |
| $\mu$ [mm <sup>-1</sup> ]                      | 0.069                                                                  |
| $F(000)$                                       | 460.0                                                                  |
| Crystal size/mm <sup>3</sup>                   | 0.21×0.18×0.11                                                         |
| Radiation                                      | MoK $\alpha$ ( $\lambda = 0.71073$ )                                   |
| 2 $\theta$ range for data collection/ $^\circ$ | 5.374 to 56.1                                                          |
| Index ranges                                   | -10 $\leq$ h $\leq$ 11, -13 $\leq$ k $\leq$ 13, -22 $\leq$ l $\leq$ 22 |
| Reflections collected                          | 21322                                                                  |
| Independent reflections                        | 6606 [ $R_{\text{int}} = 0.0910$ , $R_{\text{sigma}} = 0.1263$ ]       |
| Data/restraints/parameters                     | 6606/0/300                                                             |
| Goodness-of-fit on $F^2$                       | 0.880                                                                  |
| Final R indexes [ $I \geq 2\sigma(I)$ ]        | $R_1 = 0.0694$ , $wR_2 = 0.1813$                                       |
| Final R indexes [all data]                     | $R_1 = 0.1982$ , $wR_2 = 0.2495$                                       |
| Largest peak/hole [eÅ <sup>-3</sup> ]          | 0.23/-0.18                                                             |

**Table S2: Photophysical parameters of NI-HQ in different solvents.**

| Solvent                | $E_T$ (30) | $\nu_a$<br>( $\text{cm}^{-1}$ ) | $\nu_f$<br>( $\text{cm}^{-1}$ ) | $\Delta\nu$<br>( $\text{cm}^{-1}$ ) | $\Phi$ | $\tau$<br>(ns) | $K_r \times 10^7$<br>$\text{s}^{-1}$ | $K_{nr} \times 10^8$<br>$\text{s}^{-1}$ | $E_f$ | $\Delta f$ |
|------------------------|------------|---------------------------------|---------------------------------|-------------------------------------|--------|----------------|--------------------------------------|-----------------------------------------|-------|------------|
| Cyclohexane            | 30.8       | 29851                           | 22935                           | 6916                                | 0.37   | 1.58           | 23.4                                 | 7.7                                     | 0.28  | 0.406      |
| Hexane                 | 30.9       | 30030                           | 22935                           | 7095                                | 0.36   | ND             | ND                                   | ND                                      | ND    | 0.374      |
| Toluene                | 33.9       | 29586                           | 21505                           | 8081                                | 0.28   | ND             | ND                                   | ND                                      | ND    | 0.466      |
| Benzene                | 34.3       | 29326                           | 20920                           | 8406                                | 0.29   | ND             | ND                                   | ND                                      | ND    | 0.457      |
| Diethyl ether          | 34.5       | 29674                           | 21052                           | 8622                                | 0.23   | ND             | ND                                   | ND                                      | ND    | 0.523      |
| THF                    | 37.5       | 29674                           | 20202                           | 9472                                | 0.22   | 2.34           | 9.4                                  | 9.1                                     | 0.15  | 0.605      |
| EA                     | 38.0       | 29155                           | 19920                           | 9235                                | 0.26   | 3.03           | 8.6                                  | 9.1                                     | 0.18  | 0.570      |
| $\text{CHCl}_3$        | 39.1       | 29070                           | 20920                           | 8150                                | 0.25   | 1.81           | 13.8                                 | 8.3                                     | 0.18  | 0.569      |
| DCM                    | 40.7       | 29070                           | 20162                           | 8908                                | 0.25   | ND             | ND                                   | ND                                      | ND    | 0.623      |
| DMSO                   | 45.1       | 28902                           | 17793                           | 11109                               | 0.10   | 2.52           | 4.0                                  | 9.6                                     | 0.06  | 0.705      |
| $\text{CH}_3\text{CN}$ | 45.6       | 28985                           | 18621                           | 10364                               | 0.23   | 4.97           | 4.6                                  | 9.5                                     | 0.15  | 0.655      |
| EtOH                   | 51.8       | 29069                           | 17985                           | 11084                               | 0.041  | 0.98           | 4.1                                  | 9.8                                     | 0.03  | 0.651      |
| MeOH                   | 55.4       | 28901                           | 17985                           | 10916                               | 0.013  | 0.33           | 4.0                                  | 9.6                                     | 0.01  | 0.646      |

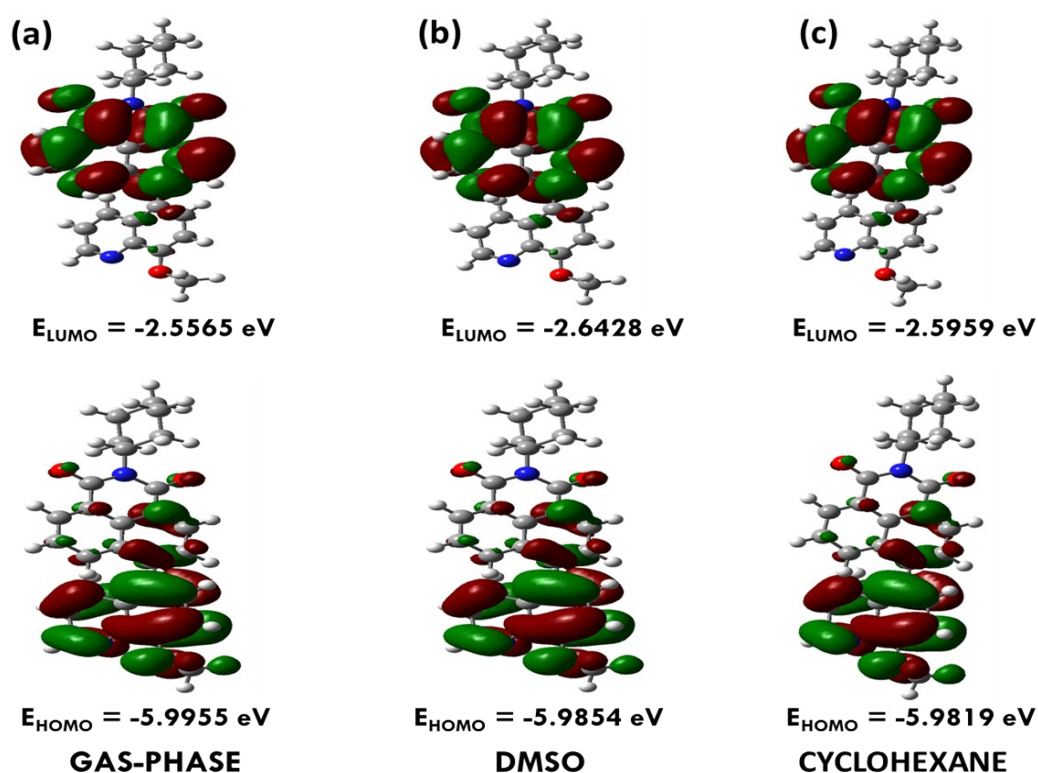

**Figure S11:** The optimized geometries of NI-HQ showing HOMO/LUMO contours in (a) gas-phase; (b) DMSO; (c) cyclohexane; and (d) absorbance spectrum of NI-HQ in gas-phase, DMSO and cyclohexane predicted by TD-DFT.



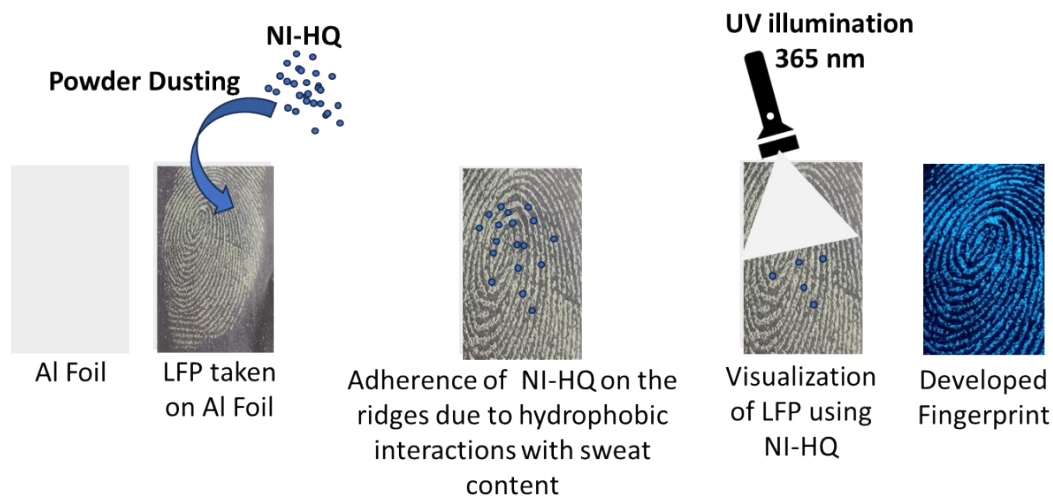

**Figure S12:** The mechanism for staining of LFPs with NI-HQ using powder dusting method.

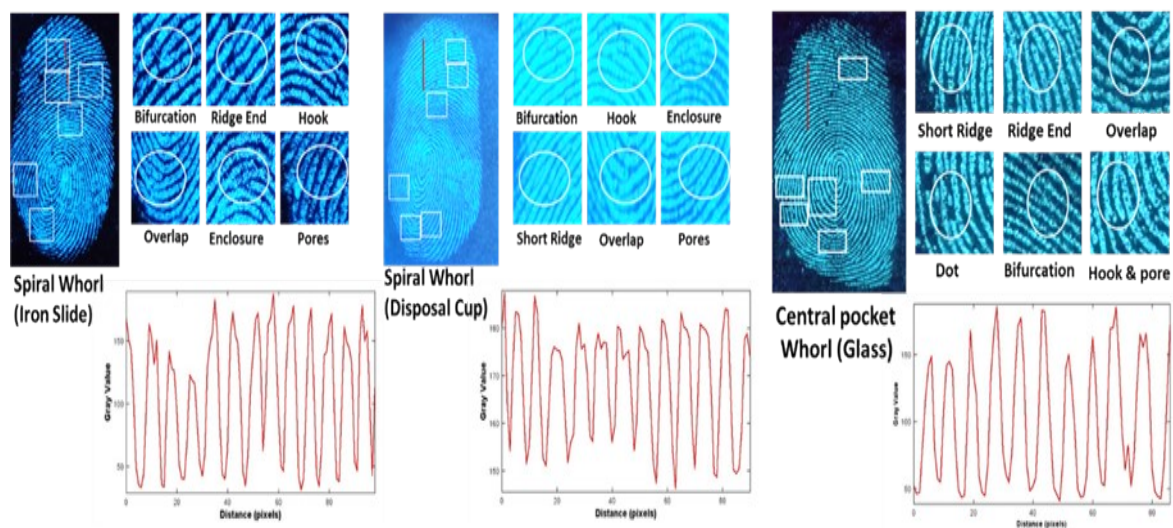

**Figure S13:** Level 1–3 details of developed FPs on the iron slide, disposal cup and glass slide and the variations of the fluorescence intensity between the fingerprint ridges and furrows across the red line.

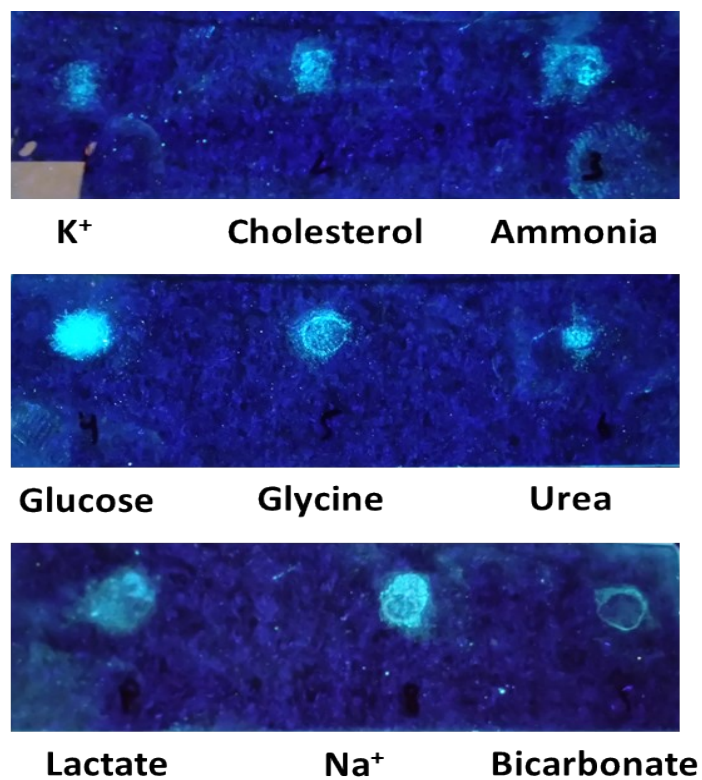

**Figure S14:** The interaction of NI-HQ with different components of the sweat using powder dusting method.

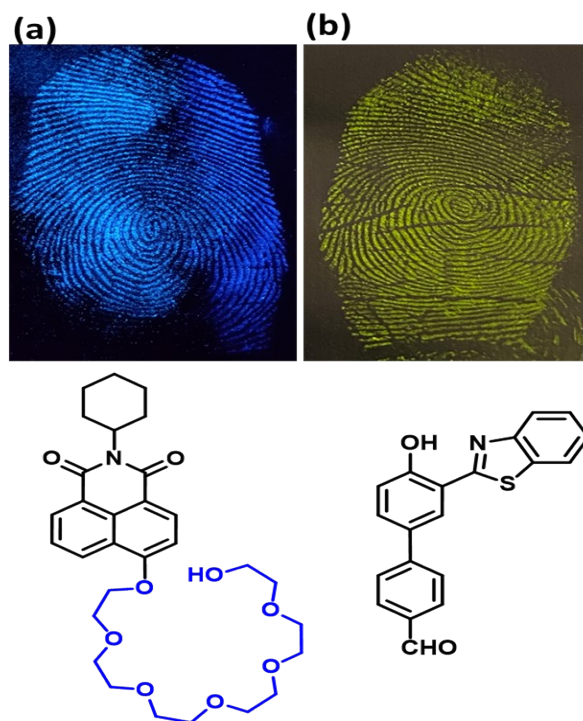

**Figure S15:** The LFPs developed using other organic-based luminophores (a) naphthalimide-hexaethylene glycol and (b) substituted hydroxyphenyl benzothiazole.

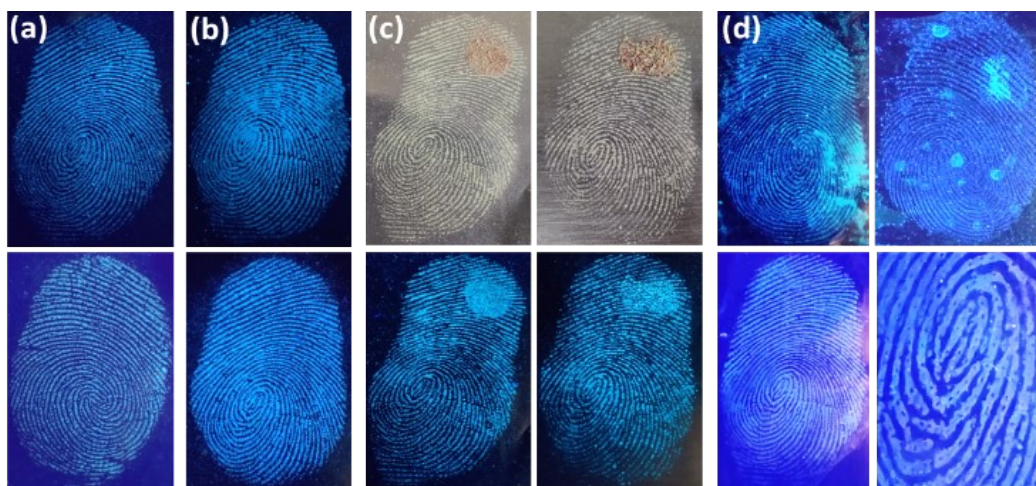

**Figure S16.** (a) Photographs of developed FPs on aluminium foil visualized after keeping for 3 months at room temperature; photographs of (b) 20 days aged LFPs and (c) stained LFPs taken on aluminium foil and developed using **NI-HQ** powder; (top) daylight images and (bottom) after illumination under 365 nm UV lamp and (d) photographs of LFPs taken on aluminium foil and developed using 1 mM solution of **NI-HQ** in 70% H<sub>2</sub>O–CH<sub>3</sub>CN mixture.

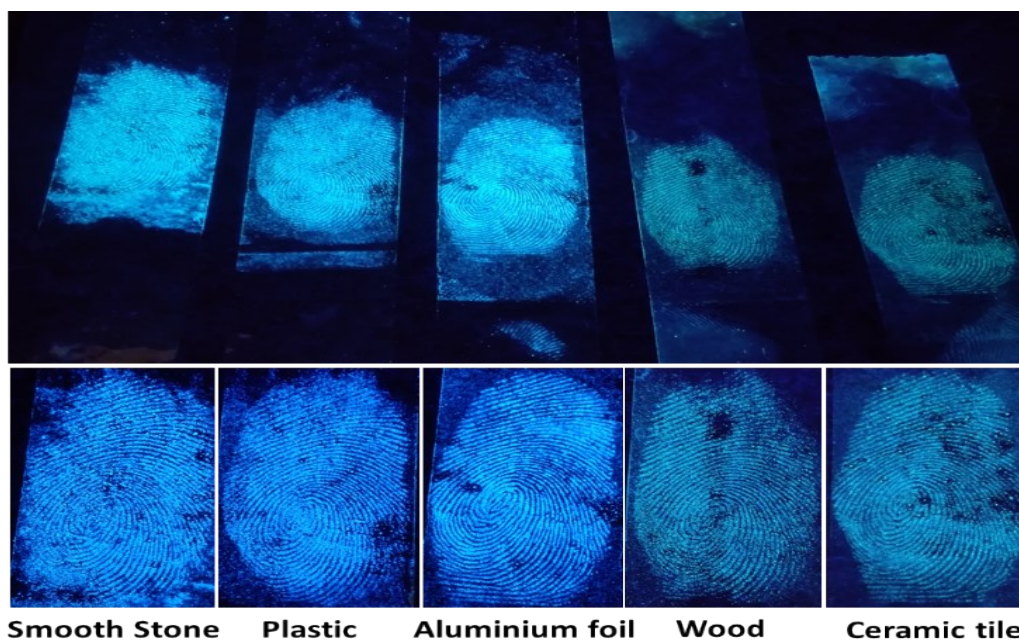

**Figure S17.** Photographs of developed FPs lifted with tape from different surfaces and pasted on the paper for documentation purposes.

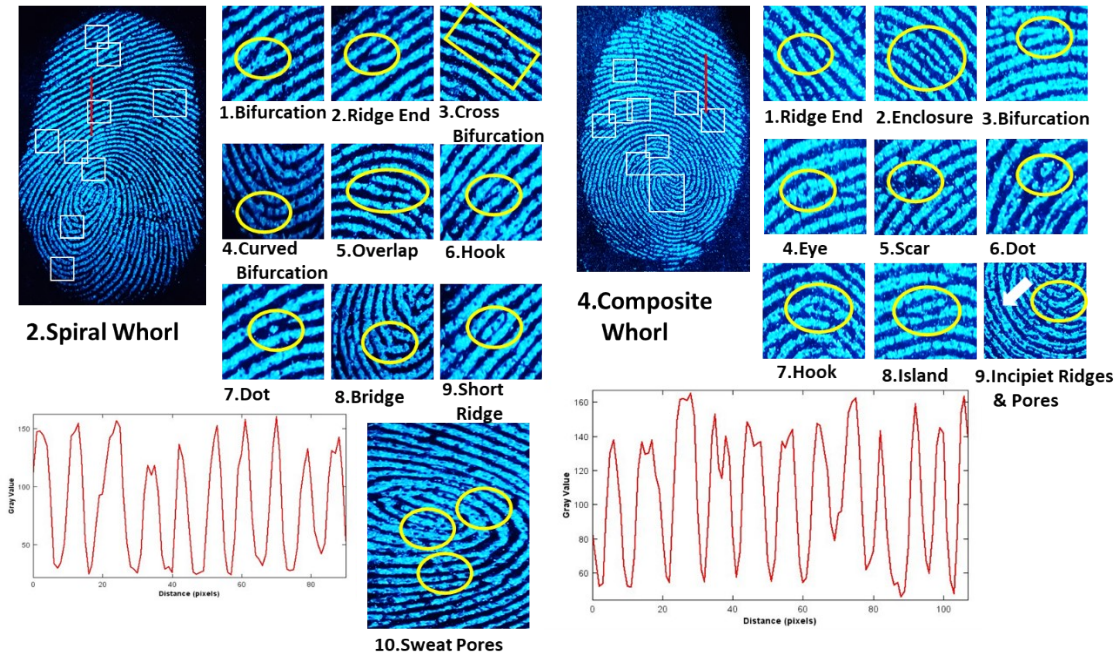

**Figure S18:** Comparing developed FPs of subjects S2 and S4 on the basis of minutiae points (level 2). The images captured under of 365 nm UV illumination lamp.

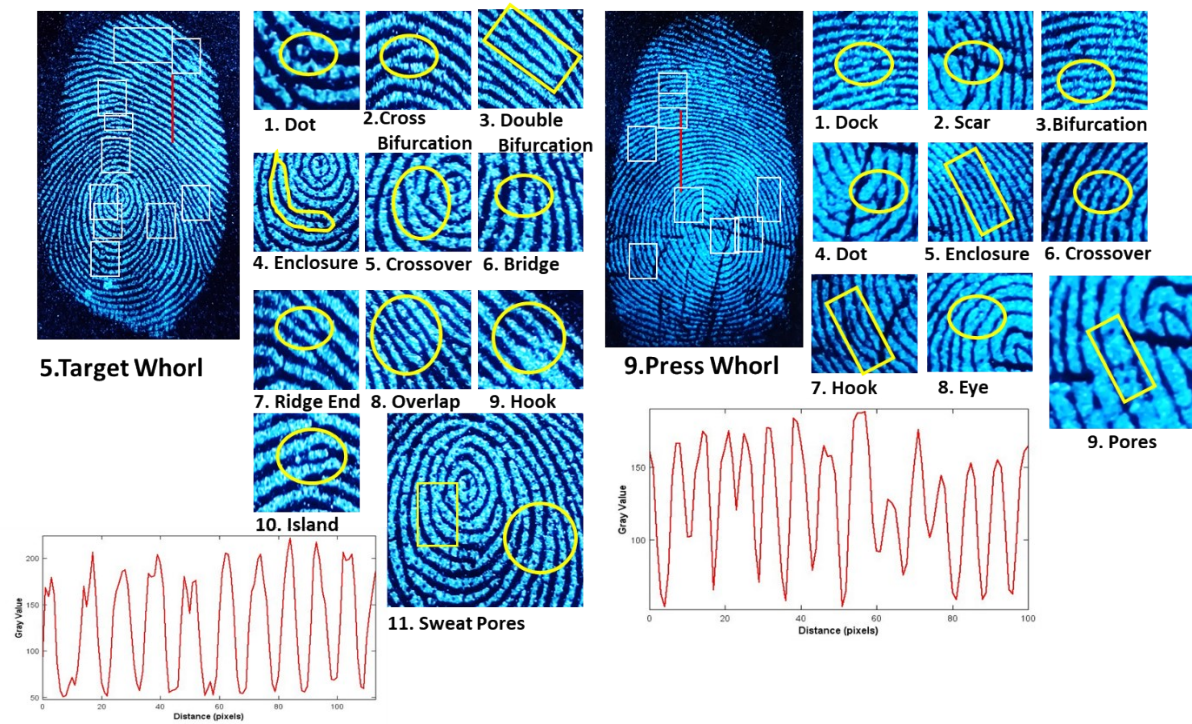

**Figure S19:** Comparing developed FPs of subjects S5 and S9 on the basis of minutiae points (level 2). The images captured under of 365 nm UV illumination lamp.

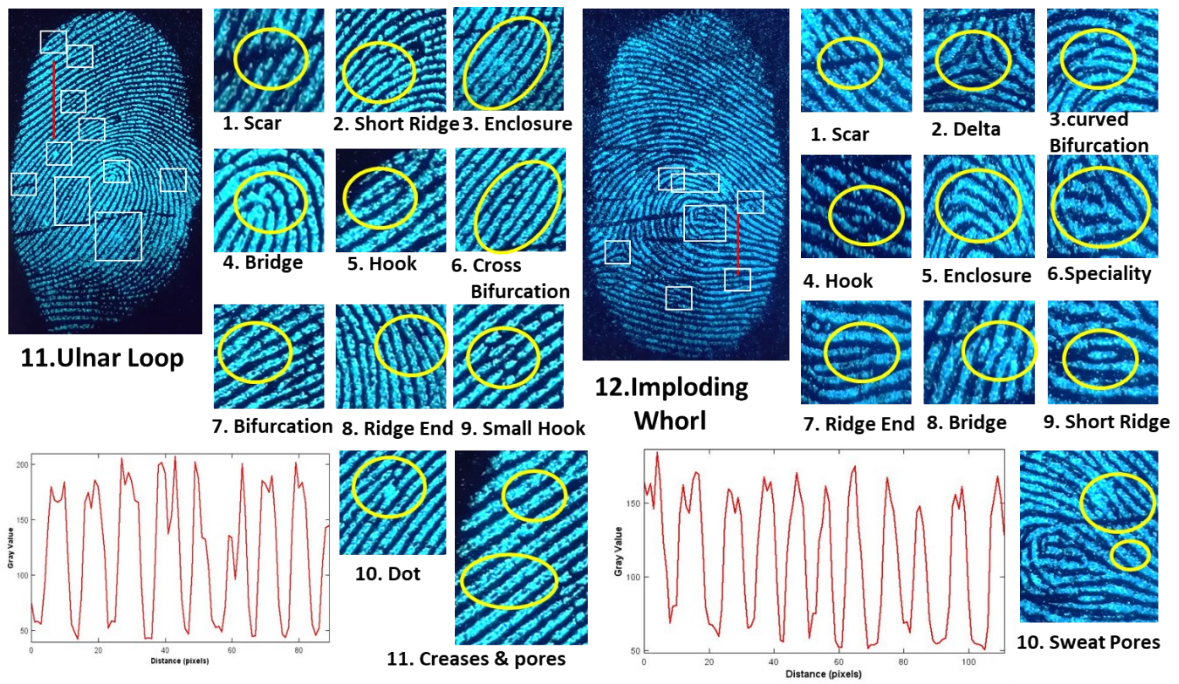

**Figure S20:** Comparing developed FPs of subjects S11 and S12 on the basis of minutiae points (level 2). The images captured under of 365 nm UV illumination lamp.
